# Supplementary material
Source: PubMed Central journal article supplement (PMC10211357)
Supplement: i1537-2073-25-3-111_s01.pdf [file i1537-2073-25-3-111_s01.pdf]

**Figure S1.** Process of Reviewing Patient Records for Study Inclusion



MC, medical cannabis; MS, multiple sclerosis.

**Figure S2.** Rate of MC Treatment Discontinuation Across the First 4 Follow-up Visits



MC, medical cannabis.

Patients ( $n = 11$ ) who were in treatment but had not yet completed 4 follow-up visits at the end of data collection (October 31, 2018) were removed from analysis. Dashed lines represent 95% CIs. Before the fourth follow-up visit, 48% of patients ( $n = 62$ ) discontinued MC treatment.

**Table S1.** Results of Self-Rating Scales<sup>a</sup>

| <u>Score</u>                             | <u>n (%)</u> |
|------------------------------------------|--------------|
| Zung Anxiety Scale                       | 46           |
| 20 – 44 (normal)                         | 38 (83)      |
| 45 – 59 (mild to moderate)               | 8 (17)       |
| 60 – 74 (marked to severe)               | 0 (0)        |
| ≥ 75 (extreme)                           | 0 (0)        |
| Beck Depression Inventory                | 48           |
| 1 – 10 (normal)                          | 21 (44)      |
| 11 – 16 (mild mood disturbance)          | 9 (19)       |
| 17 – 20 (borderline clinical depression) | 8 (17)       |
| 21 – 30 (moderate depression)            | 6 (13)       |
| 31 – 40 (severe depression)              | 1 (2)        |
| > 40 (extreme depression)                | 3 (6)        |

<sup>a</sup>Proper psychiatric care was offered to all patients who indicated symptoms of anxiety and/or depression.
